# Supplementary material
Source: PubMed Central journal article supplement (PMC5820962)
Supplement: IAI.00495-17_zii999092309s1.pdf [file IAI.00495-17_zii999092309s1.pdf]

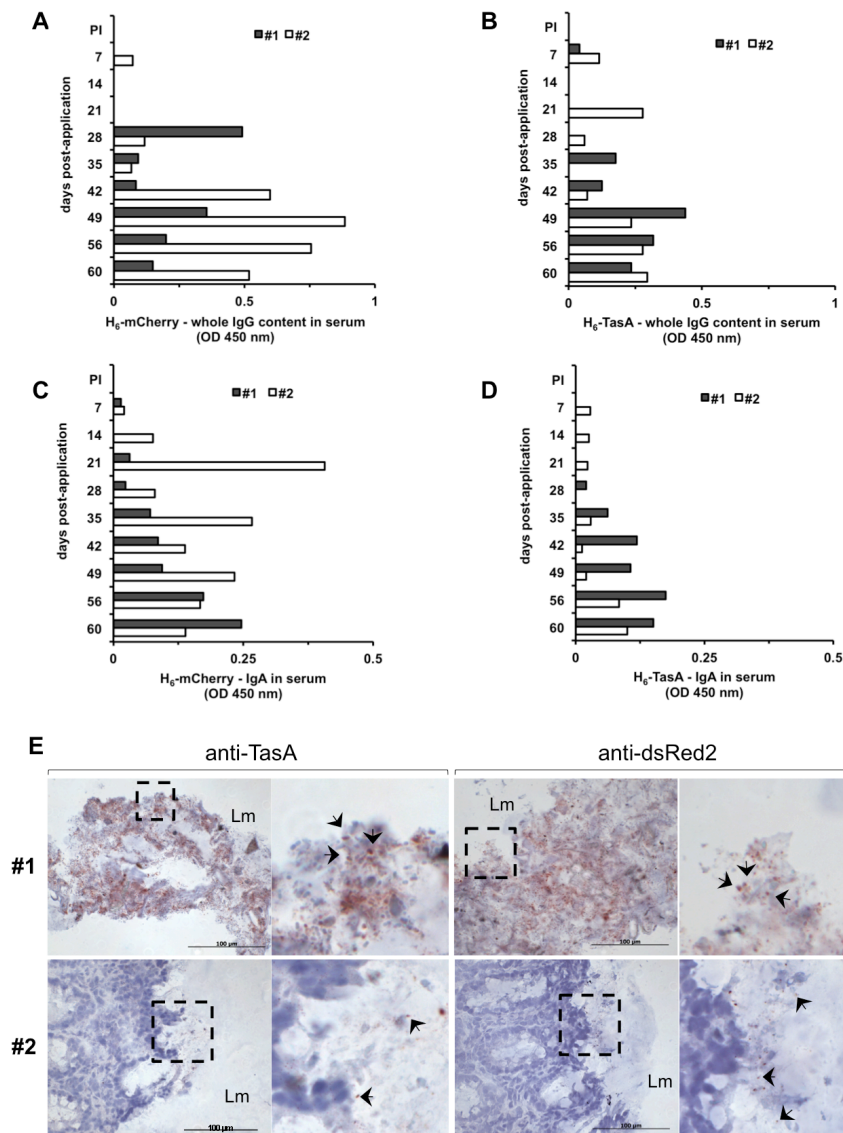

**Figure S1.** ELISA for the detection of specific immune response against H<sub>6</sub>-mCherry (**A** and **C**) and H<sub>6</sub>-TasA (**B** and **D**) in sera from dogs #1 (gray bars) and #2 (white bars) immunized with spores of *B. subtilis tasA/sinR/lux/TasA-mCherry* strain at increasing times post-application. The whole IgG (**A** and **B**) and the IgA (**C** and **D**) specific immune responses for each antigen were determined. **E**) Immunohistochemistry from cecum histological cuts of dogs #1 and #2 for the detection (black arrows) of TasA (anti-TasA, purple, left column) and mCherry (anti-dsRed2, purple, right column) positive bacteria. Intestinal tissue and the bacterial intestinal content were stained with hematoxylin and eosin. Lm: intestinal lumen. Scale bar is 100 μm

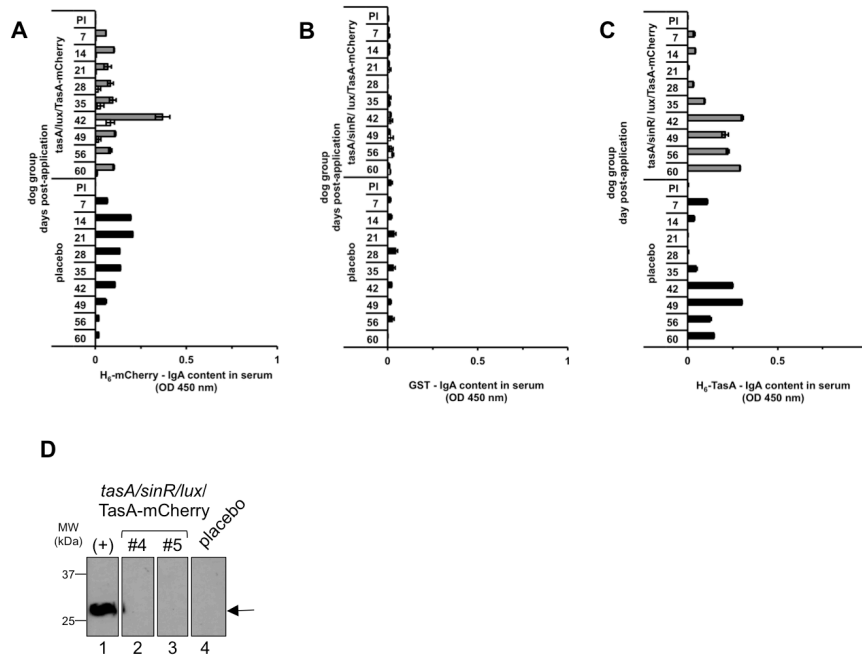

**Figure S2. Detection of humoral IgA response.** Indirect ELISA of sera from dogs at the indicated days post-application against H<sub>6</sub>-TasA (**A**), H<sub>6</sub>-mCherry (**B**) and GST (**C**). The sera were diluted to 1:500. Each tested animal group is indicated at Y-axis. Dog #4 (gray bars), dog#5 (white bars) and placebo dog (black bars). The samples were incubated with a secondary anti-IgA dog-HRP. The cut-off was subtracted to all the samples. Each value was subtracted from its corresponding pre-immune value (PI). The data represent the mean±SEM of three independent experiments. **D**) Detection of H<sub>6</sub>-mCherry by immunoblotting test strips incubated with the corresponding dog serum (diluted 1:100) at day 60 post-application. The strips were developed using specific anti-dog IgA-HRP. The positive control (+) (lane 1) corresponds to a stripe incubated with a specific mouse anti-dsRed2 (1:1000) followed by anti-mouse-HRP. The arrow indicates the position of mCherry.

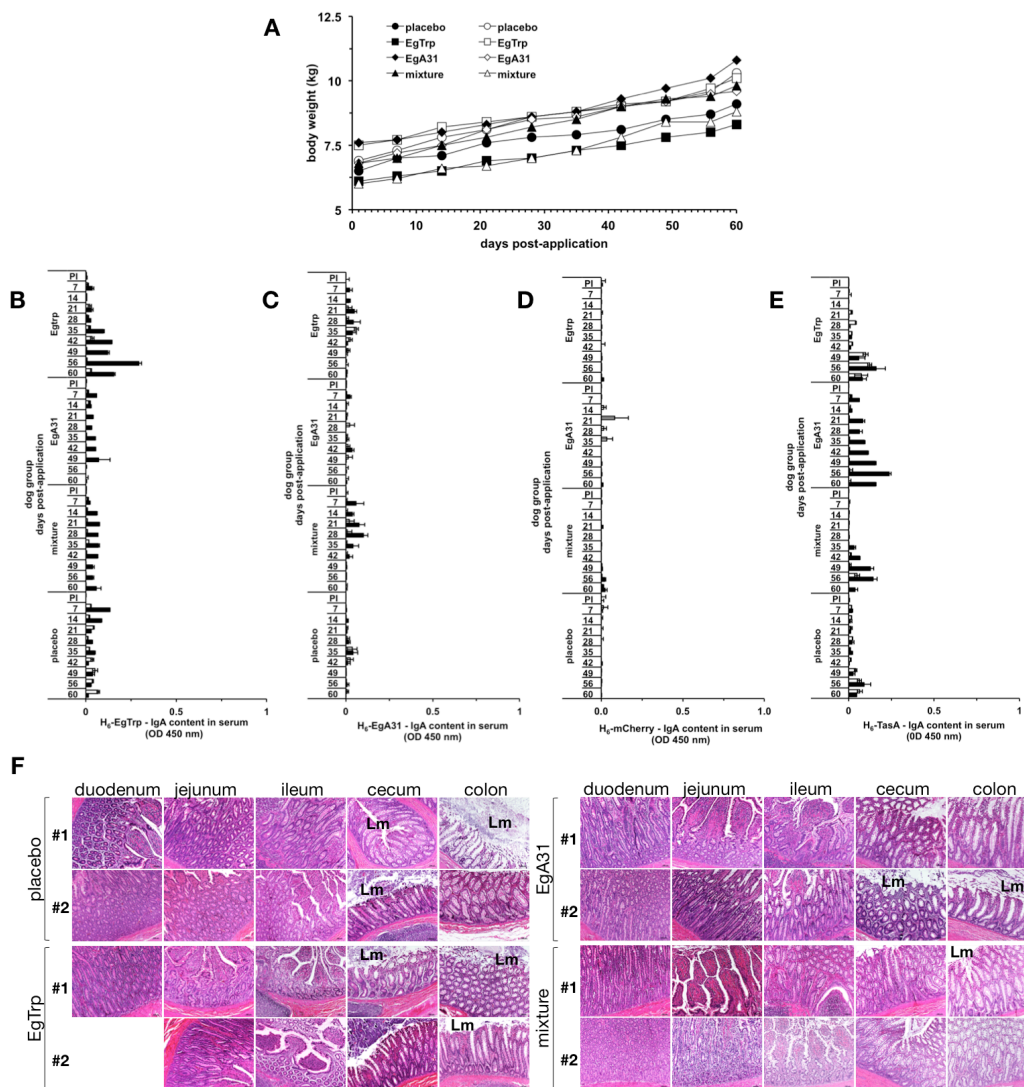

**Figure S3. Specific humoral immune response of dogs after oral application of recombinant *Bacillus subtilis* spore carrying *Echinococcus granulosus* antigens.** A) Body weight curves of dogs at the indicated times post-application with recombinant *B. subtilis* spores. Indirect ELISA of dogs sera at the indicated days post-application against recombinants H<sub>6</sub>-EgTrp (B), H<sub>6</sub>-EgA31 (C), H<sub>6</sub>-mCherry (D) and H<sub>6</sub>-TasA (E). The sera were diluted to 1:100. The cut-off was subtracted to all the samples. Each value had subtracted to its corresponding pre-immune value (PI). The data represent the mean  $\pm$  SEM of three independent experiments. F) Histological cuts of a representative of an intestine region of dogs stained with hematoxylin and eosin. The number and the group of the immunized animals are labeled in the left column. Lm, lumen. Scale bar is 100  $\mu$ m.

TABLE S1. Primers used for plasmid construction.

| Amplified segment  | Oligonucleotide sequences                                     |
|--------------------|---------------------------------------------------------------|
| pTapA              | Fwd. : 5' -GAT <u>CCCGCGG</u> TCAGAGTTAAATGGTATTGCT-3'        |
|                    | Rev. : 5' -GATCGAATTCGTAAAACACTGTAACCTGATATGACAA-3'           |
| RBS- <i>luxCDA</i> | Fwd. : 5' -ATGCGAATTCACATAAGGAGGAACACTACTATGACTAAAATTCATTC-3' |
|                    | Rev. : 5' -GATCGAGCTCACCGGTGCGCCACCTCTGCTATACGCC-3'           |
| <i>luxABE</i>      | Fwd. : 5' -GATCACCGGTTTATGTGGTGGCTGAATCAGC-3'                 |
|                    | Rev. : 5' -GATCGAGCTCTCAACTATTAAATGCTTGGTT-3'                 |
| (102-278)EgA31     | Fwd. : 5' -GATCGGATCCTTGAAACATCTACTAAGCTTGAC-3'               |
|                    | Rev. : 5' -GATCCTGCAGTCAGAAGGAAGTGAGCTCCGC-3'                 |
| mCherry            | Fwd. : 5' -GATCGGATCCGCATGGTGAGCAAGGGCGAGGAG-3'               |
|                    | Rev. : 5' -AGCTAAGCTTTTACTTGTACAGCTCGTCCATGCCGCC-3'           |

\* Restriction enzyme recognition sites are underlined.

\*\*Initiation and stop codons are labeled in bold.

TABLE S2. Assignment of the 16S *rrnE* gene of bacteria isolated from dog's feces.

| Isolated sample | Sample origin       | Assigned bacterial species                             |
|-----------------|---------------------|--------------------------------------------------------|
| 1.8             | UZH animal facility | <i>Bacillus subtilis subsp. subtilis</i> strain DSM 10 |
| 1.20            | UZH animal facility | <i>Enterococcus hirae</i> strain R                     |
| 1.45            | UZH animal facility | <i>Bacillus subtilis subsp. subtilis</i> strain DSM 10 |
| 1.50            | UZH animal facility | <i>Enterococcus hirae</i> strain R                     |
| 2.1             | UZH animal facility | <i>Bacillus subtilis subsp. subtilis</i> strain DSM    |
| 2.5             | UZH animal facility | <i>Bacillus subtilis subsp. subtilis</i> strain DSM    |
| 2.8             | UZH animal facility | <i>Bacillus aerophilus</i> strain 28K                  |
| 2.9             | UZH animal facility | <i>Bacillus subtilis subsp. subtilis</i> strain DSM 10 |
| 2.16            | UZH animal facility | <i>Bacillus subtilis subsp. subtilis</i> strain DSM 10 |
| 3.4             | UZH animal facility | <i>Bacillus subtilis subsp. subtilis</i> strain DSM 10 |
| 5.9             | UZH animal facility | <i>Bacillus subtilis subsp. subtilis</i> strain DSM 10 |
| 5.22            | UZH animal facility | <i>Bacillus subtilis subsp. subtilis</i> strain DSM 10 |
| 6.1             | UZH animal facility | <i>Bacillus subtilis subsp. subtilis</i> strain DSM 10 |
| 6.2             | UZH animal facility | <i>Bacillus subtilis subsp. subtilis</i> strain DSM 10 |
| 6.3             | UZH animal facility | <i>Bacillus vallismortis</i> DSM11031                  |
| 6.24            | UZH animal facility | <i>Bacillus subtilis subsp. subtilis</i> strain DSM 10 |
| 7.1             | UZH animal facility | <i>Bacillus subtilis subsp. subtilis</i> strain DSM 10 |
| 7.2             | UZH animal facility | <i>Bacillus subtilis subsp. subtilis</i> strain DSM 10 |
| 7.5             | UZH animal facility | <i>Bacillus subtilis subsp. subtilis</i> strain DSM 10 |
| 7.7             | UZH animal facility | <i>Streptococcus lutetiensis</i> strain HDP90246       |
| 7.11            | UZH animal facility | <i>Bacillus subtilis subsp. subtilis</i> strain DSM 10 |
| 7.24            | UZH animal facility | <i>Bacillus subtilis subsp. subtilis</i> strain DSM 10 |
| 7.25            | UZH animal facility | <i>Streptococcus infantarius</i> strain HDP90104; SLB  |
| A1              | Outdoor dog         | <i>Bacillus subtilis subsp. subtilis</i> strain DSM 10 |
| B14             | Outdoor dog         | <i>Bacillus subtilis subsp. subtilis</i> strain DSM 10 |
| B16             | Outdoor dog         | <i>Bacillus subtilis subsp. subtilis</i> strain DSM 10 |
| B22             | Outdoor dog         | <i>Bacillus subtilis subsp. subtilis</i> strain DSM 10 |
| B30             | Outdoor dog         | <i>Bacillus subtilis subsp. subtilis</i> strain DSM 10 |
| B32             | Outdoor dog         | <i>Bacillus subtilis subsp. subtilis</i> strain DSM 10 |
| B38             | Outdoor dog         | <i>Bacillus subtilis subsp. subtilis</i> strain DSM 10 |
| B39             | Outdoor dog         | <i>Bacillus subtilis subsp. subtilis</i> strain DSM 10 |
| B41             | Outdoor dog         | <i>Bacillus subtilis subsp. subtilis</i> strain DSM 10 |
| B45             | Outdoor dog         | <i>Bacillus subtilis subsp. subtilis</i> strain DSM 10 |
| B46             | Outdoor dog         | <i>Bacillus subtilis subsp. subtilis</i> strain DSM 10 |
| C11             | Outdoor dog         | <i>Bacillus subtilis subsp. subtilis</i> strain DSM 10 |
| C13             | Outdoor dog         | <i>Bacillus subtilis subsp. subtilis</i> strain DSM 10 |
| C26             | Outdoor dog         | <i>Bacillus subtilis subsp. subtilis</i> strain DSM 10 |
| D2              | Outdoor dog         | <i>Bacillus subtilis subsp. subtilis</i> strain DSM 10 |
| E6              | Outdoor dog         | <i>Bacillus subtilis subsp. subtilis</i> strain DSM 10 |
| E22             | Outdoor dog         | <i>Bacillus subtilis subsp. subtilis</i> strain DSM 10 |
| E24             | Outdoor dog         | <i>Bacillus subtilis subsp. subtilis</i> strain DSM 10 |
| E31             | Outdoor dog         | <i>Bacillus subtilis subsp. subtilis</i> strain DSM 10 |

|     |             |                                                        |
|-----|-------------|--------------------------------------------------------|
| E34 | Outdoor dog | <i>Bacillus subtilis subsp. subtilis</i> strain DSM 10 |
| E35 | Outdoor dog | <i>Bacillus subtilis subsp. subtilis</i> strain DSM 10 |
| E36 | Outdoor dog | <i>Bacillus subtilis subsp. subtilis</i> strain DSM 10 |
| E38 | Outdoor dog | <i>Bacillus subtilis subsp. subtilis</i> strain DSM 10 |
| E39 | Outdoor dog | <i>Bacillus subtilis subsp. subtilis</i> strain DSM 10 |
| E46 | Outdoor dog | <i>Bacillus subtilis subsp. subtilis</i> strain DSM 10 |
| E50 | Outdoor dog | <i>Bacillus subtilis subsp. subtilis</i> strain DSM 10 |
| F2  | Outdoor dog | <i>Bacillus subtilis subsp. subtilis</i> strain DSM 10 |
| G29 | Outdoor dog | <i>Bacillus subtilis subsp. subtilis</i> strain DSM 10 |
| H2  | Outdoor dog | <i>Bacillus subtilis subsp. subtilis</i> strain DSM 10 |

---
